# Supplementary material for: Short-Chain Fatty Acid Production by Gut Microbiota from Children with Obesity Differs According to Prebiotic Choice and Bacterial Community Composition
Source: PubMed Central journal article supplement (PMC7439474; doi:10.1128/mbio.00914-20), 2020-08-11

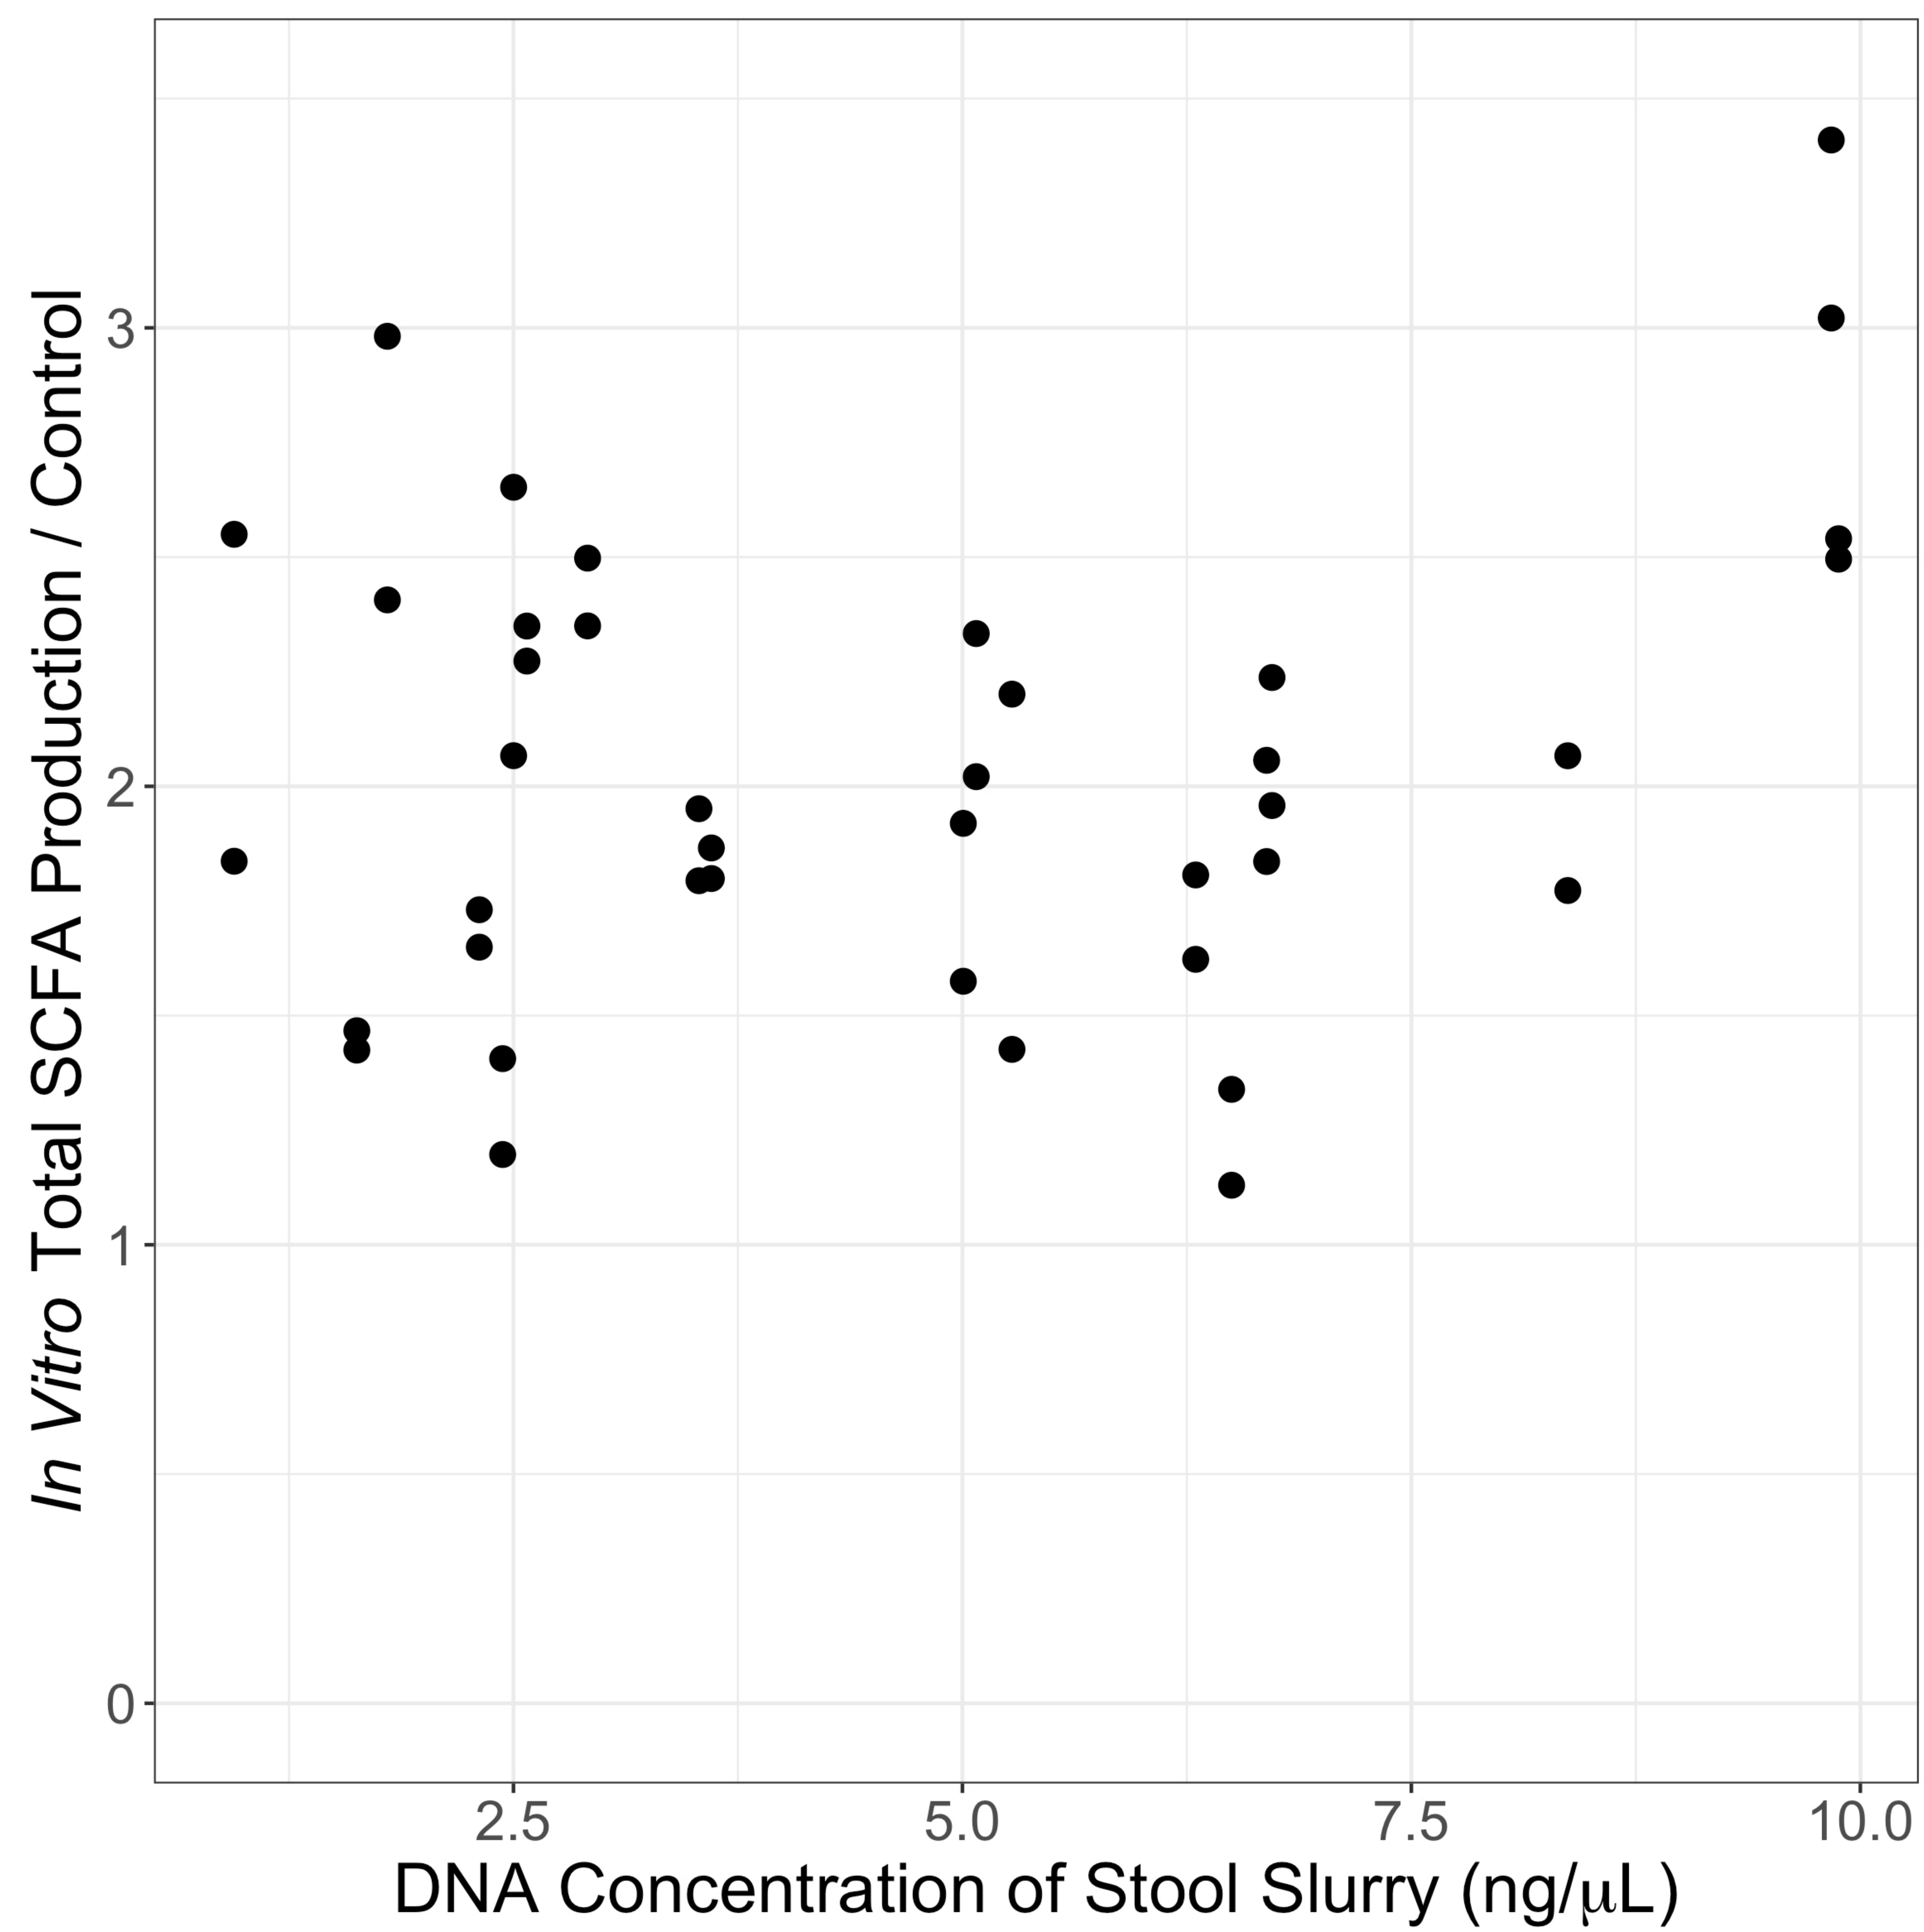

Supplement: mBio.00914-20-sf001.pdf [file mBio.00914-20-sf001.pdf]
